# Supplementary material
Source: ML conference proceedings conference paper supplement (https://openreview.net/forum?id=pKRYZpCDr-p)
Supplement: supplementary_material [file attachment]

We provide the source code by the anonymous Github link:

<https://anonymous.4open.science/r/NIML-Meta-Learnig-in-GNN-A2D7/>
